# Supplementary material
Source: PubMed Central journal article supplement (PMC4516570)
Supplement: NIHMS666859-supplement-1.pdf [file NIHMS666859-supplement-1.pdf]

**Table S1: Change in the area under the curve (AUC) for probable MI, all-cause mortality and the composite of MI / all-cause mortality with addition of plasma CX3CL1 data**

| ROC AUC in Model 2        |                |             |         |
|---------------------------|----------------|-------------|---------|
|                           | Without CX3CL1 | With CX3CL1 | P-value |
| Probable MI               | 0.66           | 0.67        | 0.01    |
| All-cause mortality       | 0.68           | 0.7         | <0.001  |
| MI or All-cause mortality | 0.66           | 0.68        | <0.001  |
| ROC AUC in Model 5        |                |             |         |
|                           | Without CX3CL1 | With CX3CL1 | P-value |
| Probable MI               | 0.74           | 0.74        | 0.2     |
| All-cause mortality       | 0.74           | 0.76        | <0.001  |
| MI or All-cause mortality | 0.73           | 0.74        | 0.01    |

Model 2: CX3CL1 + Demographic factors + Traditional risk factors (diabetes, hypertension, hyperlipidemia, tobacco use, body mass index)

Model 5: CX3CL1 + Demographic factors + Traditional risk factors + plasma inflammatory biomarkers + kidney function measures (CRIC-defined estimated glomerular filtration rate(14) and log transformed urinary albumin: creatinine ratio) + metabolic syndrome
