# Supplementary material
Source: PubMed Central journal article supplement (PMC4516570)
Supplement: NIHMS666859-supplement-2.pdf [file NIHMS666859-supplement-2.pdf]

**Table S2: Baseline metabolic parameters by quartiles of plasma CX3CL1**

|                                                         | CX3CL1 Levels*              |                                 |                                 |                             | P value† |
|---------------------------------------------------------|-----------------------------|---------------------------------|---------------------------------|-----------------------------|----------|
|                                                         | Quartile 1<br>(<0.66 ng/ml) | Quartile 2<br>(0.66-0.85 ng/ml) | Quartile 3<br>(0.86-1.08 ng/ml) | Quartile 4<br>>1.08 (ng/ml) |          |
| <b>Characteristic (N=3687)</b>                          | N=923                       | N=923                           | N=921                           | N=920                       |          |
| Diabetes (n=1778, 48.22%)                               | 323 (35.0%)                 | 412 (44.6%)                     | 484 (52.6%)                     | 559 (60.8%)                 | <0.001   |
| Metabolic syndrome (n=2404, 65.2%)                      | 540 (58.5%)                 | 583 (63.2%)                     | 628 (68.2%)                     | 653 (71.0%)                 | <0.001   |
| Presence of Individual Criteria for Metabolic syndrome‡ |                             |                                 |                                 |                             |          |
| Waist circumference (n=2441, 66.2%)                     | 599 (64.9%)                 | 626 (67.8%)                     | 605 (65.7%)                     | 611 (66.4%)                 | 0.4      |
| TG (n=1397, 37.9%)                                      | 336 (36.4%)                 | 337 (36.5%)                     | 366 (39.7%)                     | 358 (38.9%)                 | 0.3      |
| HDL (n=1833, 49.7%)                                     | 447 (48.4%)                 | 465 (50.4%)                     | 487 (52.9%)                     | 434 (47.2%)                 | 0.08     |
| Glucose (n=2195, 59.5%)                                 | 451 (48.9%)                 | 524 (56.8%)                     | 581 (63.1%)                     | 639 (69.5%)                 | <0.001   |
| Blood pressure (n=3225, 87.5%)                          | 753 (81.6%)                 | 801 (86.8%)                     | 818 (88.8%)                     | 853 (92.7%)                 | <0.001   |
| Glucose (mg/dl) §                                       | 94 (86, 112)                | 97 (87, 125)                    | 98 (87, 128)                    | 102 (87, 135)               | <0.001   |
| Insulin (uIU/mL) §                                      | 15.3 (10.8, 24.4)           | 16.3 (11.1, 25.0)               | 17.1 (11.1, 25.8)               | 15.9 (10.7, 25.4)           | 0.3      |
| Waist Circumference (cm)                                | 103.2 (93.6, 114)           | 105.5 (95.5, 118)               | 104 (93.6, 116.4)               | 104 (93.4, 117.4)           | 0.06     |
| Hemoglobin A1c (%)                                      | 5.9 (5.5, 6.7)              | 6.1 (5.6, 7.23)                 | 6.2 (5.6, 7.4)                  | 6.4 (5.7, 7.9)              | <0.001   |
| In Diabetics                                            | 7.1 (6.5, 8.1)              | 7.4 (6.6, 8.4)                  | 7.3 (6.4, 8.4)                  | 7.5 (6.4, 8.7)              | 0.3      |
| In non-diabetics                                        | 5.7 (5.4, 6.0)              | 5.7 (5.4, 6.0)                  | 5.7 (5.3, 6.0)                  | 5.7 (5.3, 6.0)              | 0.9      |
| HOMA-IR (AU)                                            | 3.8 (2.5, 6.3)              | 4.1 (2.6, 7.24)                 | 4.2 (2.6, 7.7)                  | 4.3 (2.6, 7.5)              | 0.1      |
| In Diabetics                                            | 6.7 (4.1, 12.2)             | 6.3 (4.1, 11.4)                 | 6.6 (3.7, 11.8)                 | 5.8 (3.5, 10.0)             | 0.3      |
| In non-diabetics                                        | 3.0 (2.1, 4.4)              | 3.1 (2.1, 4.6)                  | 3.1 (2.0, 4.8)                  | 2.9 (2.0, 4.3)              | 0.7      |

Note: Conversion factor for glucose in mg/dl to mmol/L, X0.05551

\*Values shown as median (IQR) or n (%) where the % is of the column category

† p-value by ANOVA (continuous variables) and Chi-squared test (categorical variables)

‡Metabolic syndrome criteria were defined as follows: waist circumference >102 cm for men and > 88 cm for women; triglycerides ≥150 mg/dl; HDL <40 mg/dl for men and <50 mg/dl for women; history of diabetes or plasma glucose ≥100 mg/dl; and history of hypertension, systolic blood pressure (SBP) >130 mm Hg, or diastolic blood pressure (DBP) >85 mm Hg.

§ log-transformed to meet normality assumption

HOMA =Homestostatic model assessment
