# Supplementary material
Source: PubMed Central journal article supplement (PMC4516570)
Supplement: NIHMS666859-supplement-3.pdf [file NIHMS666859-supplement-3.pdf]

**Table S3: Association of plasma CX3CL1 with HOMA-IR**

| <b>Model</b><br><b>(Total n=3425)</b> | <b>All Participants</b><br><b>(95% CI)*</b> | <b>P value</b> |
|---------------------------------------|---------------------------------------------|----------------|
| Model 1                               | 0.01 (-0.02, 0.04)                          | 0.4            |
| Model 2                               | 0.01 (-0.02, 0.03)                          | 0.6            |
| Model 3                               | -0.004 (-0.03, 0.02)                        | 0.8            |
| Model 4                               | -0.03 (-0.06, 0.00004)                      | 0.05           |

\* for one standard deviation increase in a plasma CX3CL1

Model 1: CX3CL1 + Demographic factors (age, sex, race)

Model 2: CX3CL1 + Demographic factors + body mass index (BMI)

Model 3: CX3CL1 + Demographic factors + BMI + plasma inflammatory biomarkers (log transformed IL6, TNF $\alpha$  and hsCRP)

Model 4: CX3CL1 + Demographic factors + BMI + plasma inflammatory biomarkers + kidney function measures (CRIC-defined estimated glomerular filtration rate<sup>15</sup> and log transformed urinary albumin: creatinine ratio
